# Supplementary material for: Preparation of sodium silicate/red mud-based ZSM-5 with glucose as a second template for catalytic cracking of waste plastics into useful chemicals
Source: Royal Society of Chemistry journal article supplement (doi:10.1039/d2ra03541c), 2022-01-01
Supplement: d2ra03541c1.pdf [file d2ra03541c1.pdf]

### Supplementary material

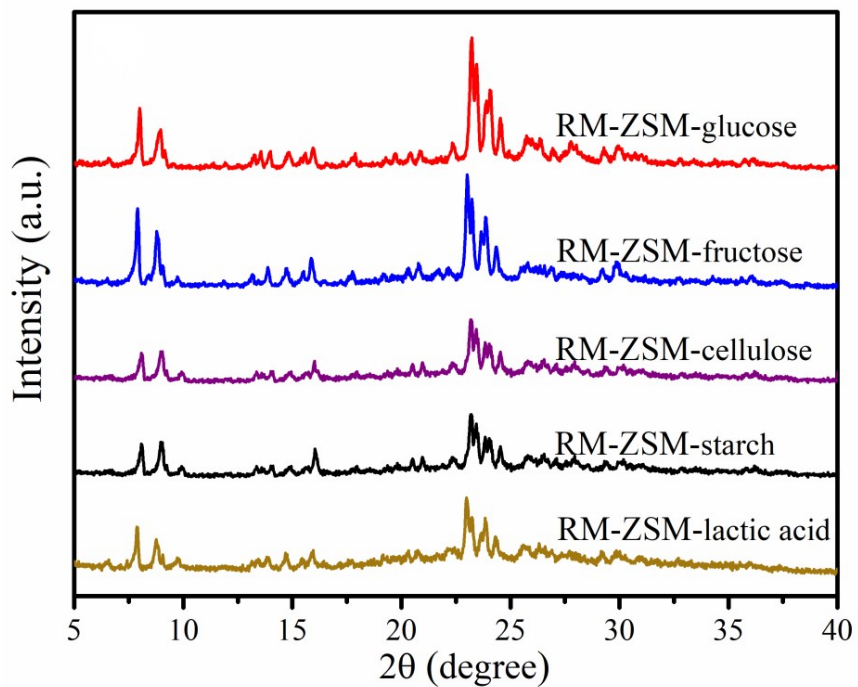

**Fig.A.1.** XRD patterns of RM-ZSM zeolites from adding different kinds of saccharides.
